# Supplementary material for: Molecular modification of planar four-coordinated cobalt active site for the electrochemical reduction of carbon dioxide: a density functional theory study
Source: Royal Society of Chemistry journal article supplement (doi:10.1039/d3qi01643a), 2023-01-01
Supplement: d3qi01643a1.pdf [file d3qi01643a1.pdf]

## **Electronic Supplementary Information**

### **Molecular modification of planar four-coordinated cobalt active site for electrochemical reduction of carbon dioxide. A density functional theory study**

Xu Ding, Yucheng Jin, Hailong Wang\* and Dongdong Qi,\*

Beijing Advanced Innovation Center for Materials Genome Engineering, Beijing Key Laboratory for Science and Application of Functional Molecular and Crystalline Materials, Department of Chemistry and Chemical Engineering, School of Chemistry and Biological Engineering, University of Science and Technology Beijing, Beijing 100083, China

## Caption of Content

|                                                                                         |     |
|-----------------------------------------------------------------------------------------|-----|
| <b>Computational detail</b>                                                             | S3  |
| <b>Fig. S1.</b> The energy level of HOMO and LUMO of Co1-Co4                            | S4  |
| <b>Fig. S2.</b> The energy level of HOMO and LUMO of Co5-Co10                           | S4  |
| <b>Fig. S3.</b> LOL- $\pi$ of Co1-Co10                                                  | S5  |
| <b>Fig. S4.</b> ESP of Co1-Co10                                                         | S5  |
| <b>Fig. S5.</b> Optimized structure of CO <sub>2</sub> adsorption on cobalt complexes   | S6  |
| <b>Fig. S6.</b> Optimized structure of CO adsorption on cobalt complexes                | S6  |
| <b>Fig. S7.</b> The whole CO <sub>2</sub> RR reaction mechanism on Co1                  | S7  |
| <b>Fig. S8.</b> The whole CO <sub>2</sub> RR reaction mechanism on Co2                  | S7  |
| <b>Fig. S9.</b> The whole CO <sub>2</sub> RR reaction mechanism on Co3                  | S8  |
| <b>Fig. S10.</b> The whole CO <sub>2</sub> RR reaction mechanism on Co4                 | S8  |
| <b>Fig. S11.</b> The whole CO <sub>2</sub> RR reaction mechanism on Co5                 | S9  |
| <b>Fig. S12.</b> The whole CO <sub>2</sub> RR reaction mechanism on Co6                 | S9  |
| <b>Fig. S13.</b> The whole CO <sub>2</sub> RR reaction mechanism on Co7                 | S10 |
| <b>Fig. S14.</b> The whole CO <sub>2</sub> RR reaction mechanism on Co8                 | S10 |
| <b>Fig. S15.</b> The whole CO <sub>2</sub> RR reaction mechanism on Co9                 | S11 |
| <b>Fig. S16.</b> The whole CO <sub>2</sub> RR reaction mechanism on Co10                | S11 |
| <b>Fig. S17.</b> Optimized structure of PDS of CO product                               | S12 |
| <b>Fig. S18.</b> Optimized structure of PDS of CH <sub>3</sub> OH product               | S12 |
| <b>Fig. S19.</b> Optimized structure of PDS of CH <sub>4</sub> product                  | S13 |
| <b>Fig. S20.</b> Reaction energy diagrams of CO <sub>2</sub> RR to CO on Co11-Co16      | S13 |
| <b>Table S1.</b> The distance of Co-X (X = N, O, S) bond lengths of Co1-Co10            | S14 |
| <b>Table S2.</b> The formation energy of Co1-Co10                                       | S14 |
| <b>Table S3.</b> The NPA charge of Co1-Co16                                             | S14 |
| <b>Table S4.</b> The NPA charge of Co, C and O atoms                                    | S15 |
| <b>Table S5.</b> Energy compared of CO desorption, *COH and*CHO generation              | S16 |
| <b>Table S6.</b> Elementary steps and energy changes for CO <sub>2</sub> RR on Co1-Co10 | S16 |
| <b>Table S7.</b> The PDS and U <sub>L</sub> on Co1-Co10                                 | S18 |
| <b>Table S8.</b> Cartesian coordinates                                                  | S19 |
| <b>Reference</b>                                                                        | S26 |

## Computational Details

All quantum chemical calculations were performed with Gaussian 09 program[S1] using the  $\omega$ B97XD[S2] density functional for all mononuclear divalent cobalt complexes. The geometry optimization and frequency calculation were operated with a mixed basis (6-311G (d, p) [S3] for C, H, O, N, S and SDD basis set[S4] for Co). The dispersion correction has been considered by using D3BJ[S5] and the natural population analysis (NPA) charge was presented. The solvent effect of water media was taken into account *via* the self-consistent reaction field (SCRF) method, using the SMD solvent model.[S6] The spin multiplicity of all structures was considered in the calculation process. The ground state of each structure was confirmed through selecting the lowest energy in these different spin number, which can greatly improve the accuracy and reliability. DOS, molecule size and d-band center were analyzed by the Multiwfn package.[S7]

The electrocatalytic mechanisms were studied based on Nørskov's computational hydrogen electrode model. This model provides an efficient approach to study proton-electron transfer in electrocatalysis without treating solvent protons explicitly and is widely used in theoretical study of electrocatalysis.[S8] In this technique, zero voltage was defined based on the potential energy ( $\mu$ ) of components involved in the reversible hydrogen electrode at all pH,  $T$  and  $p$ , therefore,  $\mu(\text{H}^+) + \mu(\text{e}^-) = \frac{1}{2}\mu(\text{H}_2)$  at a potential of 0 V. The pathways adopted for  $\text{CO}_2$  reduction to CO,  $\text{CH}_3\text{OH}$  and  $\text{CH}_4$  in this work are listed Fig. 3a. The formation energies are calculated by the equation  $E_{\text{formation}} = E_{\text{Co@SUB}} - E_{\text{SUB}} - E_{\text{Co}^{2+}}$ , where  $E_{\text{Co}^{2+}}$  is the Gibbs Free Energy of  $\text{Co}^{2+}$ ;  $E_{\text{Co@SUB}}$  and  $E_{\text{SUB}}$  are the Gibbs Free Energies of SACs and substrates, respectively. For Co-porphyrin, the substrate without metal atom was saturated with H atoms on the two N atoms, thus the formation energy is defined as  $E_{\text{formation}} = E_{\text{Co@por}} + 2E_{\text{H}} - E_{\text{por}} - E_{\text{Co}^{2+}}$ , where  $E_{\text{H}}$  is the chemical potential of H atom.

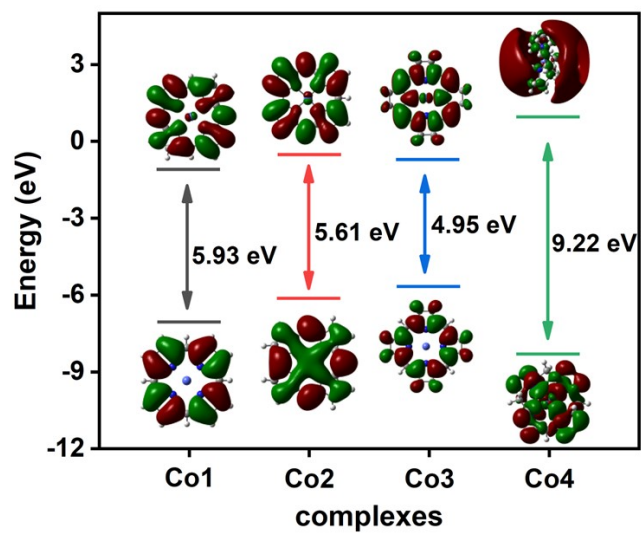

**Fig. S1.** The energy level of HOMO and LUMO of Co1-Co4.

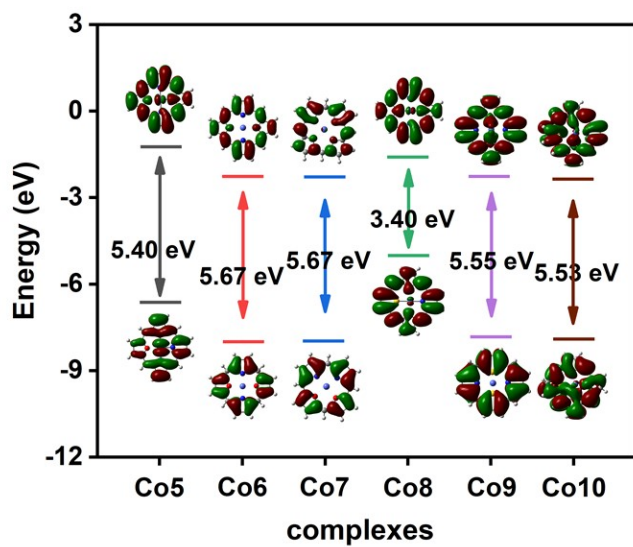

**Fig. S2.** The energy level of HOMO and LUMO of Co5-Co10.

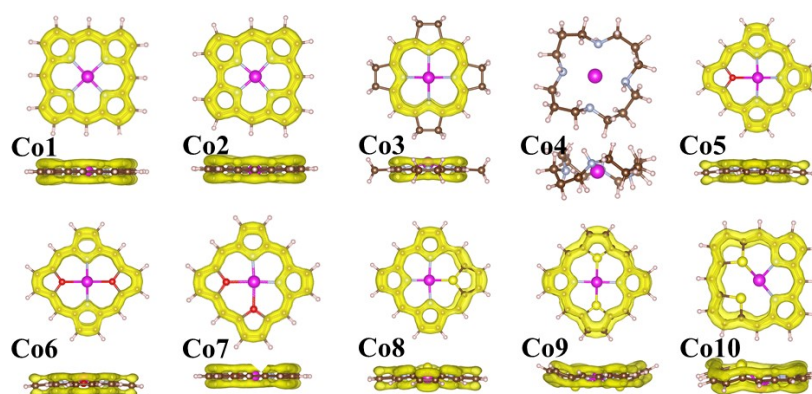

**Fig. S3.** LOL- $\pi$  (localized orbital locator) isosurface of cobalt complexes with isovalue of 0.4.

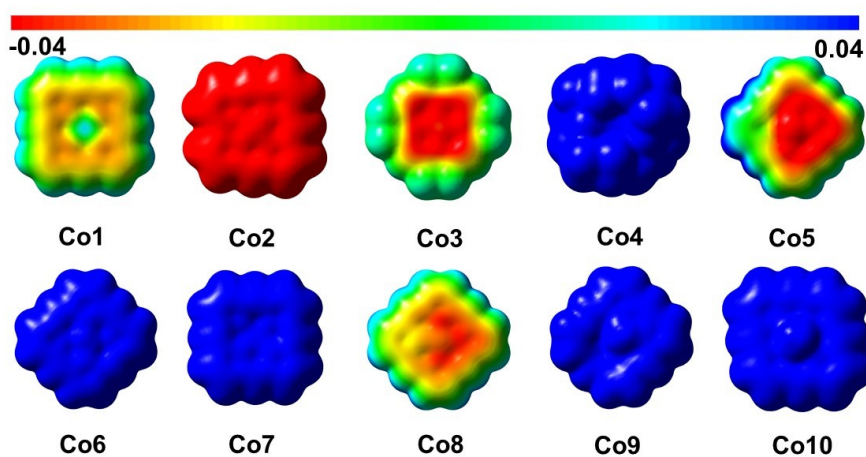

**Fig. S4.** Electrostatic potential (ESP) mapping on the surface of molecular electron density: Co1-Co10.

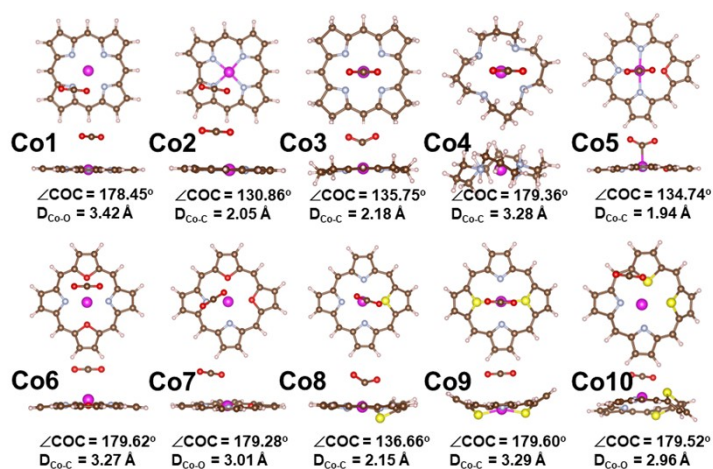

**Fig. S5.** Optimized structures of  $\text{CO}_2$  adsorption on cobalt complexes. The  $D_{\text{Co-C/O}}$  is the shortest distance between C or O atom in  $\text{CO}_2$  molecule and cobalt atom.

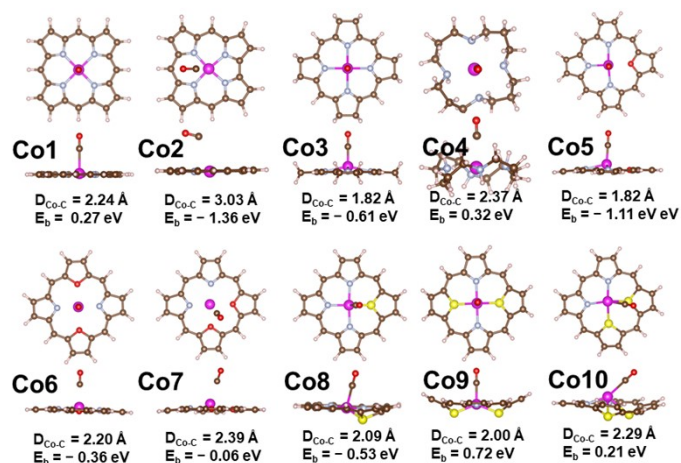

**Fig. S6.** Optimized structures of CO adsorption on cobalt complexes. The  $D_{\text{Co-C}}$  is the distance between C atom in CO molecule and cobalt atom. The  $E_b$  means binding energy of CO at cobalt atom.

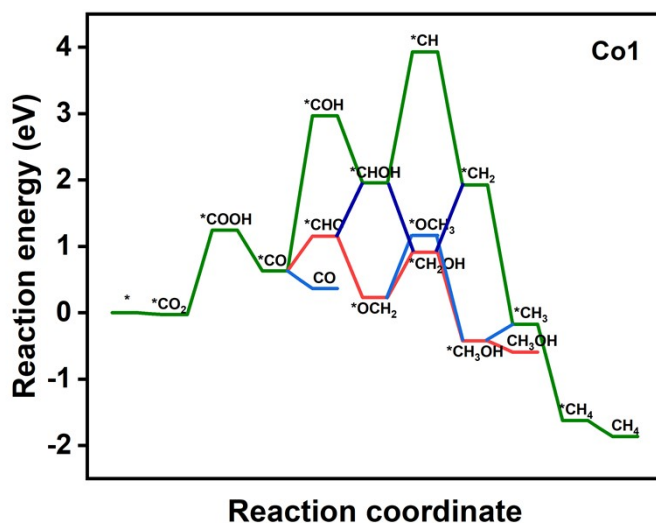

**Fig. S7.** The CO<sub>2</sub>RR reaction mechanism towards CO, CH<sub>3</sub>OH and CH<sub>4</sub> on Co1. The most favorable pathway towards CO product: \* → \*CO<sub>2</sub> → \*COOH (PDS: 1.27 eV) → \*CO → CO. The most favorable pathway towards CH<sub>3</sub>OH product: \* → \*CO<sub>2</sub> → \*COOH → \*CO → \*CHO → \*CHOH (PDS: 0.803 eV) → \*CH<sub>2</sub>OH → \*CH<sub>3</sub>OH → CH<sub>3</sub>OH. The most favorable pathway towards CH<sub>4</sub> product: \* → \*CO<sub>2</sub> → \*COOH → \*CO → \*CHO → \*CHOH (PDS: 0.803 eV) → \*CH<sub>2</sub>OH → \*CH<sub>3</sub>OH → \*CH<sub>3</sub> → \*CH<sub>4</sub> → CH<sub>4</sub>.

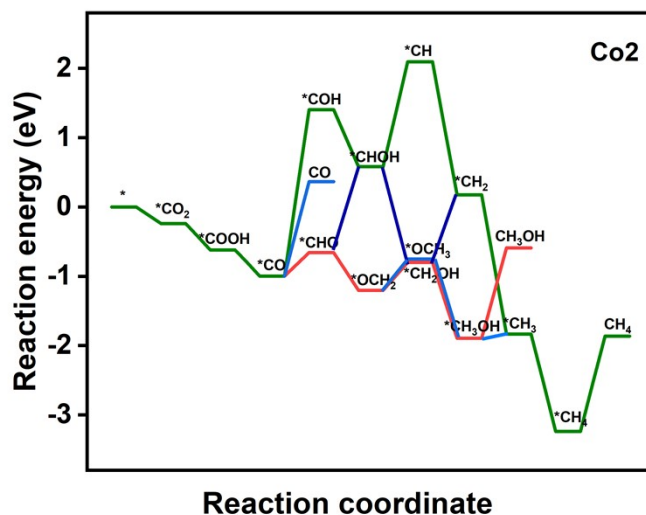

**Fig. S8.** The CO<sub>2</sub>RR reaction mechanism towards CO, CH<sub>3</sub>OH and CH<sub>4</sub> on Co2. The most favorable pathway towards CO product: \* → \*CO<sub>2</sub> → \*COOH → \*CO → CO (PDS: 1.36 eV). The most favorable pathway towards CH<sub>3</sub>OH product: \* → \*CO<sub>2</sub> → \*COOH → \*CO → \*CHO → \*OCH<sub>2</sub> → \*CH<sub>2</sub>OH → \*CH<sub>3</sub>OH → CH<sub>3</sub>OH (PDS: 1.30 eV). The most favorable pathway towards CH<sub>4</sub> product: \* → \*CO<sub>2</sub> → \*COOH → \*CO → \*CHO → \*OCH<sub>2</sub> → \*CH<sub>2</sub>OH → \*CH<sub>3</sub>OH → \*CH<sub>3</sub> → \*CH<sub>4</sub> → CH<sub>4</sub> (PDS: 1.37 eV).

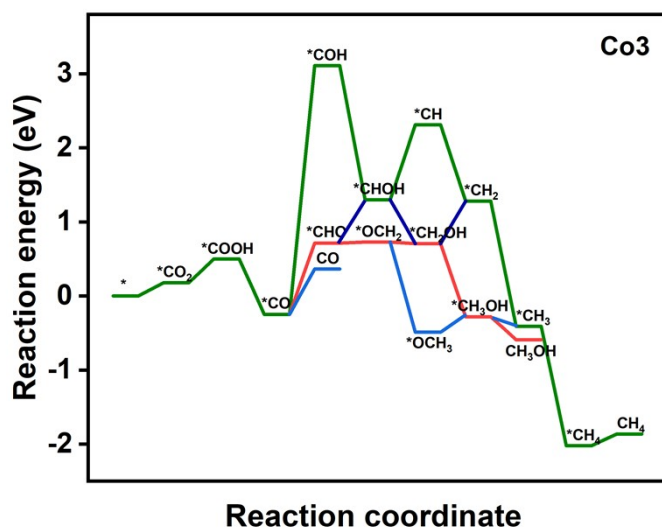

**Fig. S9.** The CO<sub>2</sub>RR reaction mechanism towards CO, CH<sub>3</sub>OH and CH<sub>4</sub> on Co<sub>3</sub>. The most favorable pathway towards CO product: \* → \*CO<sub>2</sub> → \*COOH → \*CO → CO (PDS: 0.61 eV). The most favorable pathway towards CH<sub>3</sub>OH product: \* → \*CO<sub>2</sub> → \*COOH → \*CO → \*CHO (PDS: 0.96 eV) → \*OCH<sub>2</sub> → \*CH<sub>2</sub>OH → \*CH<sub>3</sub>OH → CH<sub>3</sub>OH. The most favorable pathway towards CH<sub>4</sub> product: \* → \*CO<sub>2</sub> → \*COOH → \*CO → \*CHO (PDS: 0.96 eV) → \*OCH<sub>2</sub> → \*CH<sub>2</sub>OH → \*CH<sub>3</sub>OH → \*CH<sub>3</sub> → \*CH<sub>4</sub> → CH<sub>4</sub>.

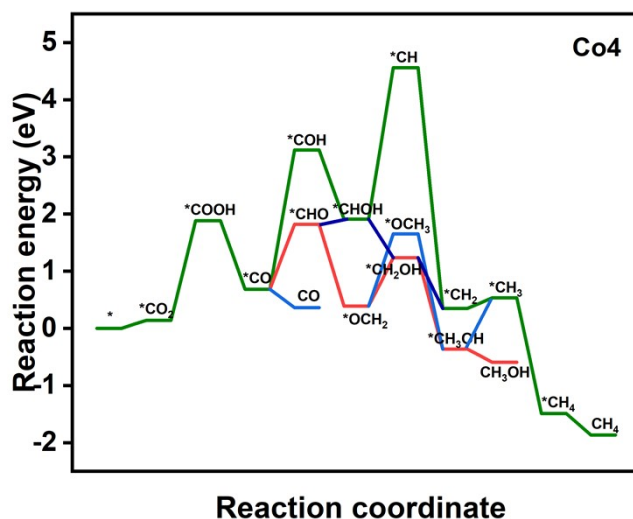

**Fig. S10.** The CO<sub>2</sub>RR reaction mechanism towards CO, CH<sub>3</sub>OH and CH<sub>4</sub> on Co<sub>4</sub>. The most favorable pathway towards CO product: \* → \*CO<sub>2</sub> → \*COOH (PDS: 1.74 eV) → \*CO → CO. The most favorable pathway towards CH<sub>3</sub>OH product: \* → \*CO<sub>2</sub> → \*COOH → \*CO → \*CHO (PDS: 1.14 eV) → \*CHOH → \*CH<sub>2</sub>OH → \*CH<sub>3</sub>OH → CH<sub>3</sub>OH. The most favorable pathway towards CH<sub>4</sub> product: \* → \*CO<sub>2</sub> → \*COOH → \*CO → \*CHO (PDS: 1.14 eV) → \*CHOH → \*CH<sub>2</sub>OH → \*CH<sub>2</sub> → \*CH<sub>3</sub> → \*CH<sub>4</sub> → CH<sub>4</sub>.



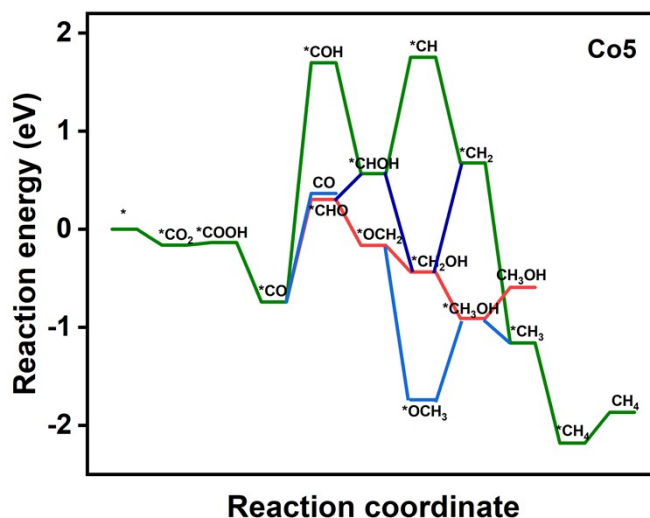

**Fig. S11.** The CO<sub>2</sub>RR reaction mechanism towards CO, CH<sub>3</sub>OH and CH<sub>4</sub> on Co5. The most favorable pathway towards CO product: \* → \*CO<sub>2</sub> → \*COOH → \*CO → CO (PDS: 1.11 eV). The most favorable pathway towards CH<sub>3</sub>OH product: \* → \*CO<sub>2</sub> → \*COOH → \*CO → \*CHO (PDS: 1.04 eV) → \*OCH<sub>2</sub> → \*CH<sub>2</sub>OH → \*CH<sub>3</sub>OH → CH<sub>3</sub>OH. The most favorable pathway towards CH<sub>4</sub> product: \* → \*CO<sub>2</sub> → \*COOH → \*CO → \*CHO (PDS: 1.04 eV) → \*OCH<sub>2</sub> → \*CH<sub>2</sub>OH → \*CH<sub>3</sub>OH → \*CH<sub>3</sub> → \*CH<sub>4</sub> → CH<sub>4</sub>.

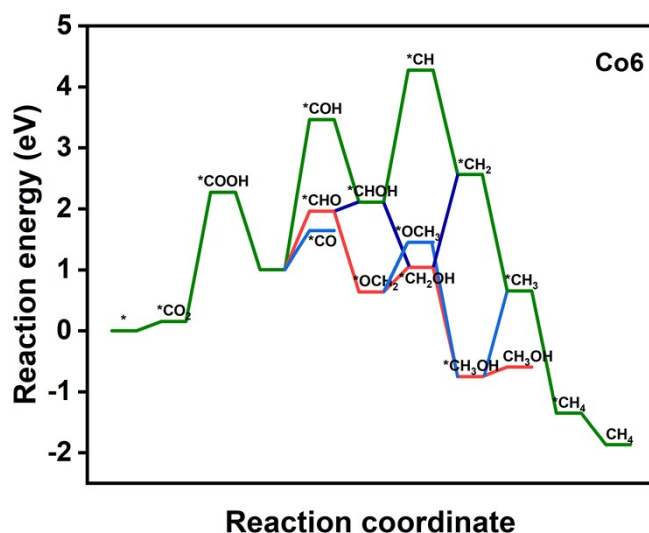

**Fig. S12.** The CO<sub>2</sub>RR reaction mechanism towards CO, CH<sub>3</sub>OH and CH<sub>4</sub> on Co6. The most favorable pathway towards CO product: \* → \*CO<sub>2</sub> → \*COOH (PDS: 2.11 eV) → \*CO → CO. The most favorable pathway towards CH<sub>3</sub>OH product: \* → \*CO<sub>2</sub> → \*COOH → \*CO → \*CHO (PDS: 0.96 eV) → \*CHOH → \*OCH<sub>3</sub> → \*CH<sub>3</sub>OH → CH<sub>3</sub>OH. The most favorable pathway towards CH<sub>4</sub> product: \* → \*CO<sub>2</sub> → \*COOH → \*CO → \*CHO → \*CHOH → \*CH<sub>2</sub>OH → \*CH<sub>3</sub>OH → \*CH<sub>3</sub> (PDS: 1.40 eV) → \*CH<sub>4</sub> → CH<sub>4</sub>.

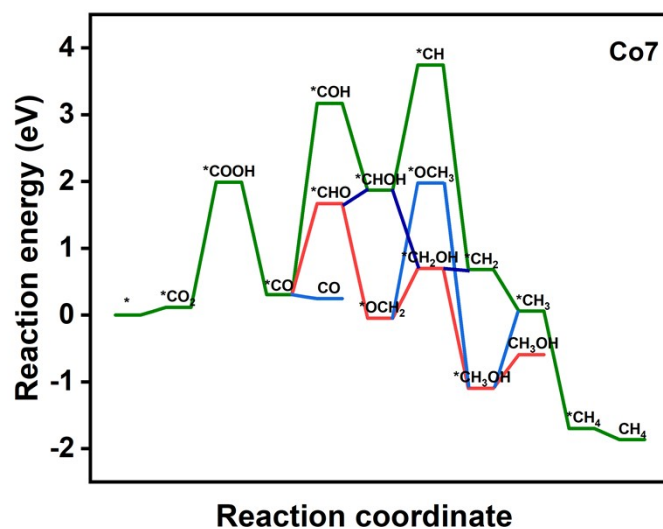

**Fig. S13.** The CO<sub>2</sub>RR reaction mechanism towards CO, CH<sub>3</sub>OH and CH<sub>4</sub> on Co7. The most favorable pathway towards CO product: \* → \*CO<sub>2</sub> → \*COOH (PDS: 1.87 eV) → \*CO → CO. The most favorable pathway towards CH<sub>3</sub>OH product: \* → \*CO<sub>2</sub> → \*COOH → \*CO → \*CHO (PDS: 1.36 eV) → \*OCH<sub>2</sub> → \*CH<sub>2</sub>OH → \*CH<sub>3</sub>OH → CH<sub>3</sub>OH. The most favorable pathway towards CH<sub>4</sub> product: \* → \*CO<sub>2</sub> → \*COOH → \*CO → \*CHO (PDS: 1.36 eV) → \*OCH<sub>2</sub> → \*CH<sub>2</sub>OH → \*CH<sub>2</sub> → \*CH<sub>3</sub> → \*CH<sub>4</sub> → CH<sub>4</sub>.

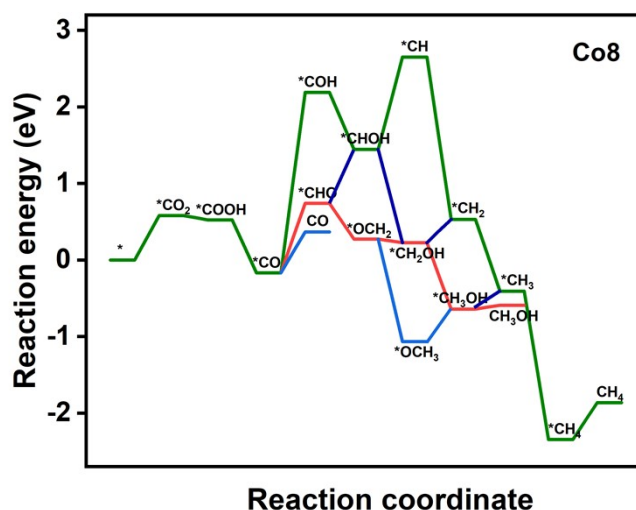

**Fig. S14.** The CO<sub>2</sub>RR reaction mechanism towards CO, CH<sub>3</sub>OH and CH<sub>4</sub> on Co8. The most favorable pathway towards CO product: \* → \*CO<sub>2</sub> (PDS: 0.58 eV) → \*COOH → \*CO → CO. The most favorable pathway towards CH<sub>3</sub>OH product: \* → \*CO<sub>2</sub> → \*COOH → \*CO → \*CHO (PDS: 0.91 eV) → \*OCH<sub>2</sub> → \*CH<sub>2</sub>OH → \*CH<sub>3</sub>OH → CH<sub>3</sub>OH. The most favorable pathway towards CH<sub>4</sub> product: \* → \*CO<sub>2</sub> → \*COOH → \*CO → \*CHO (PDS: 0.91 eV) → \*OCH<sub>2</sub> → \*CH<sub>2</sub>OH → \*CH<sub>3</sub>OH → \*CH<sub>3</sub> → \*CH<sub>4</sub> → CH<sub>4</sub>.

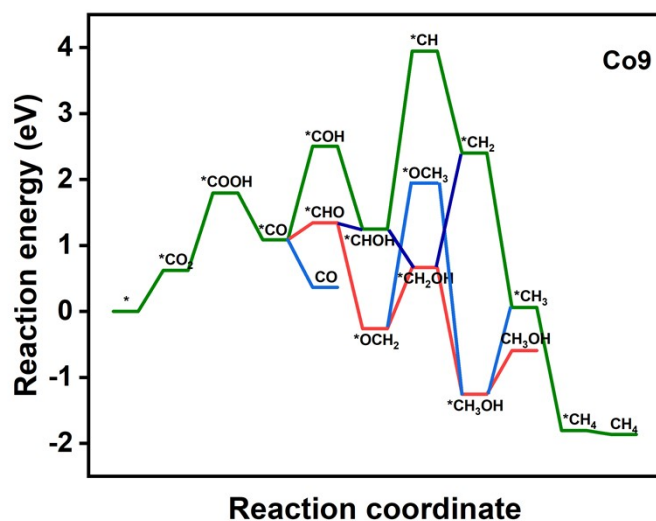

**Fig. S15.** The CO<sub>2</sub>RR reaction mechanism towards CO, CH<sub>3</sub>OH and CH<sub>4</sub> on Co9. The most favorable pathway towards CO product: \* → \*CO<sub>2</sub> → \*COOH (PDS: 1.17 eV) → \*CO → CO. The most favorable pathway towards CH<sub>3</sub>OH product: \* → \*CO<sub>2</sub> → \*COOH → \*CO → \*CHO → \*CHOH → \*CH<sub>2</sub>OH → \*CH<sub>3</sub>OH → CH<sub>3</sub>OH (PDS: 0.66 eV). The most favorable pathway towards CH<sub>4</sub> product: \* → \*CO<sub>2</sub> → \*COOH → \*CO → \*CHO → \*CHOH → \*CH<sub>2</sub>OH → \*CH<sub>3</sub>OH → \*CH<sub>3</sub> (PDS: 1.31 eV) → \*CH<sub>4</sub> → CH<sub>4</sub>.

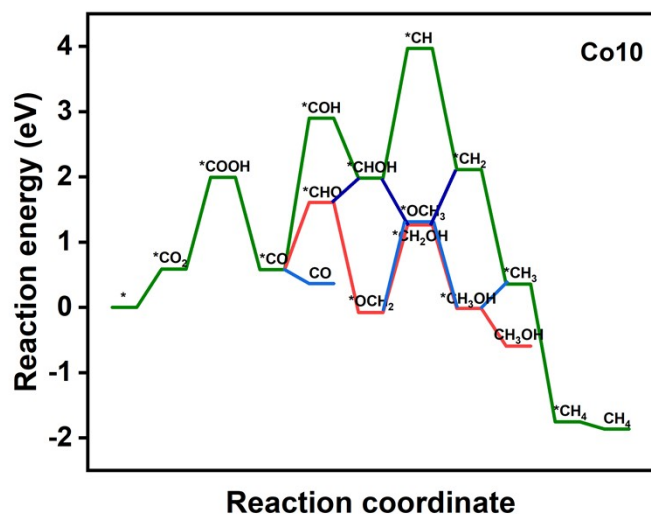

**Fig. S16.** The CO<sub>2</sub>RR reaction mechanism towards CO, CH<sub>3</sub>OH and CH<sub>4</sub> on Co10. The most favorable pathway towards CO product: \* → \*CO<sub>2</sub> → \*COOH (PDS: 1.41 eV) → \*CO → CO. The most favorable pathway towards CH<sub>3</sub>OH product: \* → \*CO<sub>2</sub> → \*COOH → \*CO → \*CHO (PDS: 1.03 eV) → \*CHOH → \*CH<sub>2</sub>OH → \*CH<sub>3</sub>OH → CH<sub>3</sub>OH. The most favorable pathway towards CH<sub>4</sub> product: \* → \*CO<sub>2</sub> → \*COOH → \*CO → \*CHO (PDS: 1.03 eV) → \*CHOH → \*CH<sub>2</sub>OH → \*CH<sub>3</sub>OH → \*CH<sub>3</sub> → \*CH<sub>4</sub> → CH<sub>4</sub>.

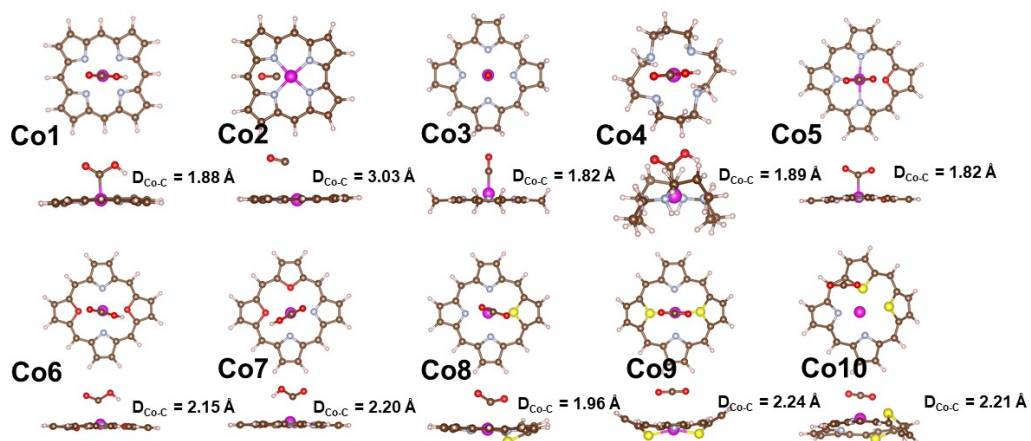

**Fig. S17.** Optimized structure of intermediates in potential-determining step of CO product.

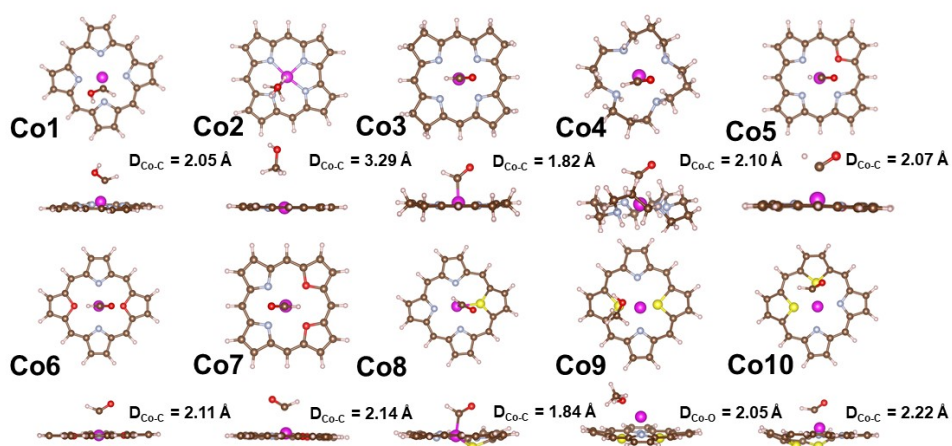

**Fig. S18.** Optimized structure of intermediates in potential-determining step of  $\text{CH}_3\text{OH}$  product.

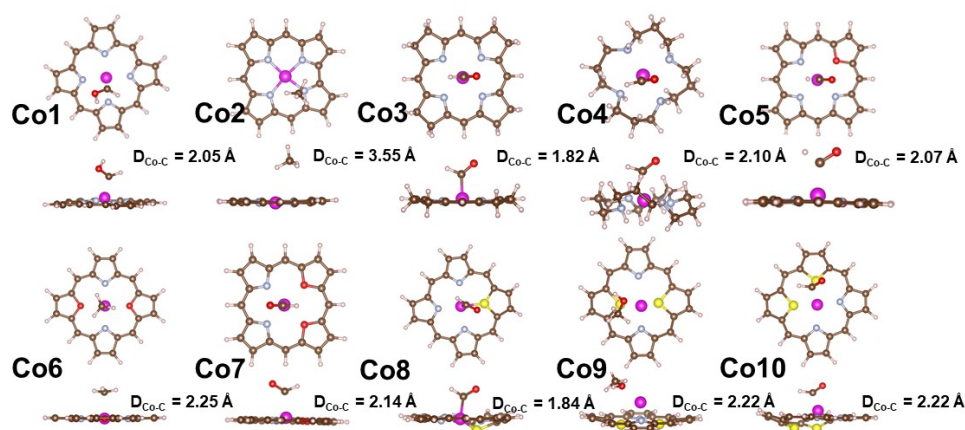

**Fig. S19.** Optimized structure of intermediates in potential-determining step of  $\text{CH}_4$  product.

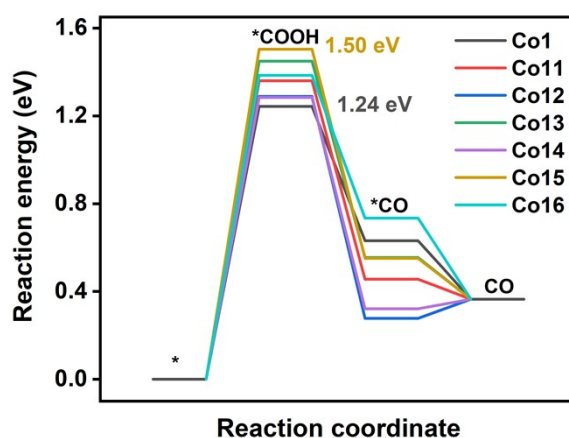

**Fig. S20.** Free energy diagrams of  $\text{CO}_2\text{RR}$  to  $\text{CO}$  and corresponding intermediates on Co1 and Co11-Co16 complexes. The values in figures refer to the free energy change for the potential determining step on Co1 and Co15. The asterisks mean intermediates bind at active site.

**Table S1.** The distance of Co-X (X =N, O, S) bond lengths on cobalt complexes.

| Complexes          | Co1   | Co2   | Co3   | Co4   | Co5   | Co6   | Co7   | Co8   | Co9   | Co10  |
|--------------------|-------|-------|-------|-------|-------|-------|-------|-------|-------|-------|
| D <sub>Co-N1</sub> | 2.053 | 1.876 | 2.097 | 2.174 | 1.945 | 2.020 | 2.005 | 2.022 | 2.732 | 2.040 |
| D <sub>Co-N2</sub> | 2.053 | 1.876 | 2.097 | 2.191 | 1.937 | 2.022 | 1.992 | 1.890 | 2.732 | 2.076 |
| D <sub>Co-N3</sub> | 2.053 | 1.882 | 2.097 | 2.166 | 1.945 |       |       | 2.022 |       |       |
| D <sub>Co-N4</sub> | 2.053 | 1.882 | 2.097 | 2.155 |       |       |       |       |       |       |
| D <sub>Co-O1</sub> |       |       |       |       | 2.151 | 2.216 | 2.181 |       |       |       |
| D <sub>Co-O2</sub> |       |       |       |       |       | 2.215 | 2.158 |       |       |       |
| D <sub>Co-S1</sub> |       |       |       |       |       |       |       | 2.119 | 2.513 | 3.263 |
| D <sub>Co-S2</sub> |       |       |       |       |       |       |       |       | 2.513 | 2.765 |

**Table S2.** The formation energy of cobalt complexes.

| Complexes             | Co1   | Co2   | Co3   | Co4   | Co5   | Co6   | Co7   | Co8   | Co9   | Co10  |
|-----------------------|-------|-------|-------|-------|-------|-------|-------|-------|-------|-------|
| Formation energy (eV) | -8.91 | -11.2 | -8.80 | -1.88 | -7.51 | -1.95 | -1.78 | -7.50 | -5.74 | -0.44 |

**Table S3.** The natural population analysis of cobalt atom in cobalt complexes.

| Complexes | Co1   | Co2   | Co3   | Co4   | Co5   | Co6   | Co7   | Co8   | Co9   | Co10  |
|-----------|-------|-------|-------|-------|-------|-------|-------|-------|-------|-------|
| charge    | 1.240 | 0.599 | 0.502 | 1.424 | 0.423 | 1.530 | 1.507 | 0.545 | 1.757 | 1.750 |

  

| Complexes | Co11  | Co12  | Co13  | Co14  | Co15  | Co16  |
|-----------|-------|-------|-------|-------|-------|-------|
| charge    | 1.247 | 1.272 | 1.258 | 1.226 | 0.950 | 1.225 |

**Table S4.** The natural population analysis of Co, C and O atom in CO molecule, cobalt complexes and \*CO intermediate. The charge difference of Co atom ( $\Delta N_{Co}$ ), C atom ( $\Delta N_C$ ) and O atom ( $\Delta N_O$ ) in \*CO intermediate before and after CO molecule anchored into cobalt complexes.

|         | Co     | C     | O      | $\Delta N_{Co}$ | $\Delta N_C$ | $\Delta N_O$ |
|---------|--------|-------|--------|-----------------|--------------|--------------|
| CO      |        | 0.474 | -0.474 |                 |              |              |
| Co1     | 0.763  |       |        |                 |              |              |
| Co1-CO  | 0.656  | 0.325 | -0.120 | -0.107          | -0.149       | 0.354        |
| Co2     | 0.714  |       |        |                 |              |              |
| Co2-CO  | 0.701  | 0.136 | -0.120 | -0.013          | -0.338       | 0.354        |
| Co3     | 0.388  |       |        |                 |              |              |
| Co3-CO  | 0.253  | 0.299 | -0.258 | -0.135          | -0.175       | 0.216        |
| Co4     | 1.085  |       |        |                 |              |              |
| Co4-CO  | -0.893 | 0.292 | -0.09  | -0.192          | -0.182       | 0.384        |
| Co5     | 0.712  |       |        |                 |              |              |
| Co5-CO  | 0.308  | 0.315 | -0.244 | -0.404          | -0.159       | 0.230        |
| Co6     | 1.516  |       |        |                 |              |              |
| Co6-CO  | 1.145  | 0.636 | -0.391 | -0.371          | 0.162        | 0.008        |
| Co7     | 1.559  |       |        |                 |              |              |
| Co7-CO  | 1.244  | 0.608 | -0.401 | -0.315          | 0.134        | 0.073        |
| Co8     | 0.709  |       |        |                 |              |              |
| Co8-CO  | 0.319  | 0.406 | -0.123 | -0.390          | -0.068       | 0.351        |
| Co9     | 0.546  |       |        |                 |              |              |
| Co9-CO  | -0.003 | 0.52  | -0.099 | -0.549          | 0.046        | 0.375        |
| Co10    | 1.084  |       |        |                 |              |              |
| Co10-CO | 0.799  | 0.296 | -0.066 | -0.285          | -0.178       | 0.408        |

CO means isolated carbon monoxide molecules; Co1 represent Co1 complex; Co1-CO means \*CO intermediate (CO adsorbed on Co1) .

**Table S5.** The energy (eV) comparison of CO desorption, \*COH and \*CHO intermediates generation on Co complexes.

| Complexes               | Co1   | Co2  | Co3  | Co4   | Co5  | Co6  | Co7   | Co8  | Co9   | Co10  |
|-------------------------|-------|------|------|-------|------|------|-------|------|-------|-------|
| $\Delta E_{\text{CO}}$  | -0.27 | 1.36 | 0.61 | -0.32 | 1.11 | 0.64 | -0.06 | 0.53 | -0.72 | -0.21 |
| $\Delta E_{\text{COH}}$ | 2.34  | 2.40 | 3.36 | 2.43  | 2.44 | 2.46 | 3.17  | 2.35 | 1.41  | 2.32  |
| $\Delta E_{\text{CHO}}$ | 0.52  | 0.34 | 0.96 | 1.14  | 1.04 | 0.96 | 1.67  | 0.91 | 0.25  | 1.03  |

**Table S6.** Proposed elementary steps and free energy changes for CO<sub>2</sub>RR pathways on Co complexes.

| Elementary step                                                                                 | $\Delta G/\text{eV}$ |       |       |       |
|-------------------------------------------------------------------------------------------------|----------------------|-------|-------|-------|
|                                                                                                 | Co1                  | Co2   | Co3   | Co4   |
| $* + \text{CO}_2 \rightarrow *\text{CO}_2$                                                      | -0.03                | -0.24 | -0.17 | 0.14  |
| $*\text{CO}_2 + \text{H}^+ + \text{e}^- \rightarrow *\text{COOH}$                               | 1.27                 | -0.38 | 0.32  | 1.74  |
| $*\text{COOH} + \text{H}^+ + \text{e}^- \rightarrow *\text{CO} + \text{H}_2\text{O}$            | -0.61                | -0.38 | -0.75 | -1.20 |
| $*\text{CO} \rightarrow * + \text{CO}$                                                          | -0.27                | 1.36  | 0.61  | -0.32 |
| $*\text{CO} + \text{H}^+ + \text{e}^- \rightarrow *\text{COH}$                                  | 2.34                 | 2.40  | 3.36  | 2.43  |
| $*\text{CO} + \text{H}^+ + \text{e}^- \rightarrow *\text{CHO}$                                  | 0.52                 | 0.34  | 0.96  | 1.14  |
| $*\text{COH} + \text{H}^+ + \text{e}^- \rightarrow *\text{CHOH}$                                | -1.02                | -0.82 | -1.81 | -1.21 |
| $*\text{CHO} + \text{H}^+ + \text{e}^- \rightarrow *\text{CHOH}$                                | 0.80                 | 1.24  | 0.58  | 0.09  |
| $*\text{CHO} + \text{H}^+ + \text{e}^- \rightarrow *\text{OCH}_2$                               | -0.92                | -0.54 | 0.01  | -1.43 |
| $*\text{CHOH} + \text{H}^+ + \text{e}^- \rightarrow *\text{CH} + \text{H}_2\text{O}$            | 1.97                 | 1.51  | 1.01  | 2.65  |
| $*\text{CHOH} + \text{H}^+ + \text{e}^- \rightarrow *\text{CH}_2\text{OH}$                      | -1.04                | -1.38 | -0.59 | -0.67 |
| $*\text{OCH}_2 + \text{H}^+ + \text{e}^- \rightarrow *\text{CH}_2\text{OH}$                     | 0.68                 | 0.40  | -0.02 | 0.85  |
| $*\text{OCH}_2 + \text{H}^+ + \text{e}^- \rightarrow *\text{OCH}_3$                             | 0.94                 | 0.45  | -1.21 | 1.26  |
| $*\text{CH} + \text{H}^+ + \text{e}^- \rightarrow *\text{CH}_2$                                 | -2.01                | -1.92 | -1.03 | -4.21 |
| $*\text{CH}_2\text{OH} + \text{H}^+ + \text{e}^- \rightarrow *\text{CH}_2 + \text{H}_2\text{O}$ | 1.01                 | 0.98  | 0.57  | -0.89 |
| $*\text{CH}_2\text{OH} + \text{H}^+ + \text{e}^- \rightarrow *\text{CH}_3\text{OH}$             | -1.33                | -1.09 | -0.99 | -1.60 |
| $*\text{OCH}_3 + \text{H}^+ + \text{e}^- \rightarrow *\text{CH}_3\text{OH}$                     | -1.59                | -1.14 | 0.21  | -2.01 |
| $*\text{CH}_2 + \text{H}^+ + \text{e}^- \rightarrow *\text{CH}_3$                               | -2.10                | -2.01 | -1.69 | 0.19  |
| $*\text{CH}_3\text{OH} + \text{H}^+ + \text{e}^- \rightarrow *\text{CH}_3 + \text{H}_2\text{O}$ | 0.25                 | 0.06  | -0.13 | 0.90  |
| $*\text{CH}_3\text{OH} \rightarrow * + \text{CH}_3\text{OH}$                                    | -0.17                | 1.30  | -0.31 | -0.23 |
| $*\text{CH}_3 + \text{H}^+ + \text{e}^- \rightarrow *\text{CH}_4$                               | -1.45                | -1.40 | -1.61 | -2.02 |
| $*\text{CH}_4 \rightarrow * + \text{CH}_4$                                                      | -0.24                | -1.37 | 0.15  | -0.38 |



| Elementary step                                | $\Delta G/eV$ |       |       |       |       |       |
|------------------------------------------------|---------------|-------|-------|-------|-------|-------|
|                                                | Co5           | Co6   | Co7   | Co8   | Co9   | Co10  |
| $* + CO_2 \rightarrow *CO_2$                   | -0.16         | 0.15  | 0.11  | 0.58  | 0.62  | 0.59  |
| $*CO_2 + H^+ + e^- \rightarrow *COOH$          | 0.03          | 2.12  | 1.88  | 0.06  | 1.17  | 1.41  |
| $*COOH + H^+ + e^- \rightarrow *CO + H_2O$     | -0.61         | -1.27 | -1.69 | -0.69 | -0.71 | -1.42 |
| $*CO \rightarrow * + CO$                       | 1.11          | -0.64 | 0.06  | 0.53  | -0.72 | 0.21  |
| $*CO + H^+ + e^- \rightarrow *COH$             | 2.44          | 2.46  | 2.87  | 2.36  | 1.42  | 2.32  |
| $*CO + H^+ + e^- \rightarrow *CHO$             | 1.04          | 0.96  | 1.36  | 0.91  | 0.26  | 1.03  |
| $*COH + H^+ + e^- \rightarrow *CHOH$           | -1.32         | -1.35 | -1.30 | -0.74 | -1.25 | -0.92 |
| $*CHO + H^+ + e^- \rightarrow *CHOH$           | 0.26          | 0.15  | 0.20  | 0.70  | -0.09 | 0.37  |
| $*CHO + H^+ + e^- \rightarrow *OCH_2$          | -0.46         | -1.32 | -1.71 | -0.47 | -1.60 | -1.69 |
| $*CHOH + H^+ + e^- \rightarrow *CH + H_2O$     | 1.19          | 2.16  | 1.87  | 1.21  | 2.69  | 1.98  |
| $*CHOH + H^+ + e^- \rightarrow *CH_2OH$        | -1.00         | -1.07 | -1.17 | -1.22 | -0.58 | -0.72 |
| $*OCH_2 + H^+ + e^- \rightarrow *CH_2OH$       | -0.27         | 0.40  | 0.75  | -0.05 | 0.93  | 1.34  |
| $*OCH_2 + H^+ + e^- \rightarrow *OCH_3$        | -1.58         | 0.81  | 2.02  | -1.34 | 2.21  | 1.39  |
| $*CH + H^+ + e^- \rightarrow *CH_2$            | -1.08         | -1.71 | -3.06 | -2.12 | -1.55 | -1.86 |
| $*CH_2OH + H^+ + e^- \rightarrow *CH_2 + H_2O$ | 1.11          | 1.52  | -0.01 | 0.30  | 1.73  | 0.84  |
| $*CH_2OH + H^+ + e^- \rightarrow *CH_3OH$      | -0.47         | -1.79 | -1.79 | -0.87 | -1.92 | -1.28 |
| $*OCH_3 + H^+ + e^- \rightarrow *CH_3OH$       | 0.83          | -2.20 | -3.07 | 0.42  | -3.20 | -1.33 |
| $*CH_2 + H^+ + e^- \rightarrow *CH_3$          | -1.83         | -1.91 | -0.62 | -0.94 | -2.34 | -1.75 |
| $*CH_3OH + H^+ + e^- \rightarrow *CH_3 + H_2O$ | -0.25         | 1.41  | 1.16  | 0.23  | 1.32  | 0.37  |
| $*CH_3OH \rightarrow * + CH_3OH$               | 0.32          | 0.16  | 0.50  | 0.05  | 0.66  | -0.58 |
| $*CH_3 + H^+ + e^- \rightarrow *CH_4$          | -1.02         | -2.01 | -1.76 | -1.94 | -1.86 | -2.11 |
| $*CH_4 \rightarrow * + CH_4$                   | 0.31          | -0.52 | -0.17 | 0.48  | -0.06 | -0.11 |

**Table S7.** Summary of CO<sub>2</sub>RR potential determining steps (PDS), limiting potential (U<sub>L</sub>) on Co1-Co10.

| Catalysts | Products           | PDS                                                                                         | $\Delta G/eV$ | U <sub>L</sub> |
|-----------|--------------------|---------------------------------------------------------------------------------------------|---------------|----------------|
| Co1       | CO                 | *CO <sub>2</sub> + H <sup>+</sup> + e <sup>-</sup> → *COOH                                  | 1.27          | -1.27          |
|           | CH <sub>3</sub> OH | *CHO + H <sup>+</sup> + e <sup>-</sup> → *CHOH                                              | 0.80          | -0.80          |
|           | CH <sub>4</sub>    | *CHO + H <sup>+</sup> + e <sup>-</sup> → *CHOH                                              | 0.80          | -0.80          |
| Co2       | CO                 | *CO → * + CO                                                                                | 1.36          | -1.36          |
|           | CH <sub>3</sub> OH | *CH <sub>3</sub> OH → * + CH <sub>3</sub> OH                                                | 1.30          | -1.30          |
|           | CH <sub>4</sub>    | *CH <sub>4</sub> → * + CH <sub>4</sub>                                                      | 1.37          | -1.37          |
| Co3       | CO                 | *CO → * + CO                                                                                | 0.61          | -0.61          |
|           | CH <sub>3</sub> OH | *CO + H <sup>+</sup> + e <sup>-</sup> → * + CHO                                             | 0.96          | -0.96          |
|           | CH <sub>4</sub>    | *CO + H <sup>+</sup> + e <sup>-</sup> → * + CHO                                             | 0.96          | -0.96          |
| Co4       | CO                 | *CO <sub>2</sub> + H <sup>+</sup> + e <sup>-</sup> → *COOH                                  | 1.74          | -1.74          |
|           | CH <sub>3</sub> OH | *CO + H <sup>+</sup> + e <sup>-</sup> → * + CHO                                             | 1.14          | -1.14          |
|           | CH <sub>4</sub>    | *CO + H <sup>+</sup> + e <sup>-</sup> → * + CHO                                             | 1.14          | -1.14          |
| Co5       | CO                 | *CO → * + CO                                                                                | 1.11          | -1.11          |
|           | CH <sub>3</sub> OH | *CO + H <sup>+</sup> + e <sup>-</sup> → * + CHO                                             | 1.04          | -1.04          |
|           | CH <sub>4</sub>    | *CO + H <sup>+</sup> + e <sup>-</sup> → * + CHO                                             | 1.04          | -1.04          |
| Co6       | CO                 | *CO <sub>2</sub> + H <sup>+</sup> + e <sup>-</sup> → *COOH                                  | 2.11          | -2.11          |
|           | CH <sub>3</sub> OH | *CO + H <sup>+</sup> + e <sup>-</sup> → * + CHO                                             | 0.96          | -0.96          |
|           | CH <sub>4</sub>    | *CH <sub>3</sub> OH + H <sup>+</sup> + e <sup>-</sup> → *CH <sub>3</sub> + H <sub>2</sub> O | 1.40          | -1.40          |
| Co7       | CO                 | *CO <sub>2</sub> + H <sup>+</sup> + e <sup>-</sup> → *COOH                                  | 1.87          | -1.87          |
|           | CH <sub>3</sub> OH | *CO + H <sup>+</sup> + e <sup>-</sup> → * + CHO                                             | 1.36          | -1.36          |
|           | CH <sub>4</sub>    | *CO + H <sup>+</sup> + e <sup>-</sup> → * + CHO                                             | 1.36          | -1.36          |
| Co8       | CO                 | * + CO <sub>2</sub> → *CO <sub>2</sub>                                                      | 0.58          | -0.58          |
|           | CH <sub>3</sub> OH | *CO + H <sup>+</sup> + e <sup>-</sup> → * + CHO                                             | 0.91          | -0.91          |
|           | CH <sub>4</sub>    | *CO + H <sup>+</sup> + e <sup>-</sup> → * + CHO                                             | 0.91          | -0.91          |
| Co9       | CO                 | *CO <sub>2</sub> + H <sup>+</sup> + e <sup>-</sup> → *COOH                                  | 1.17          | -1.17          |
|           | CH <sub>3</sub> OH | *CH <sub>3</sub> OH → * + CH <sub>3</sub> OH                                                | 0.66          | -0.66          |
|           | CH <sub>4</sub>    | *CH <sub>3</sub> OH + H <sup>+</sup> + e <sup>-</sup> → *CH <sub>3</sub> + H <sub>2</sub> O | 1.20          | -1.20          |
| Co10      | CO                 | *CO <sub>2</sub> + H <sup>+</sup> + e <sup>-</sup> → *COOH                                  | 1.41          | -1.41          |
|           | CH <sub>3</sub> OH | *CO + H <sup>+</sup> + e <sup>-</sup> → * + CHO                                             | 1.03          | -1.03          |
|           | CH <sub>4</sub>    | *CO + H <sup>+</sup> + e <sup>-</sup> → * + CHO                                             | 1.03          | -1.03          |

**Table S8. The cartesian coordinates of all catalysts.**

| Model Co1 |             |             |             |
|-----------|-------------|-------------|-------------|
| Co        | 0.00000000  | 0.00000000  | 0.00010000  |
| N         | -1.46100000 | -1.44170000 | -0.00010000 |
| C         | -2.80780000 | -1.22670000 | -0.00060000 |
| C         | -1.26400000 | -2.79120000 | 0.00040000  |
| C         | -3.49600000 | -2.49640000 | -0.00070000 |
| C         | -2.54280000 | -3.46240000 | 0.00020000  |
| H         | -4.57010000 | -2.61690000 | -0.00130000 |
| H         | -2.67780000 | -4.53480000 | 0.00050000  |
| N         | 1.44190000  | -1.46080000 | 0.00020000  |
| C         | 2.79140000  | -1.26400000 | -0.00030000 |
| C         | 1.22680000  | -2.80750000 | 0.00070000  |
| C         | 3.46250000  | -2.54280000 | -0.00060000 |
| C         | 2.49630000  | -3.49590000 | 0.00060000  |
| H         | 4.53490000  | -2.67800000 | -0.00130000 |
| H         | 2.61670000  | -4.57000000 | 0.00110000  |
| N         | 1.46100000  | 1.44170000  | -0.00010000 |
| C         | 1.26400000  | 2.79120000  | 0.00040000  |
| C         | 2.80780000  | 1.22670000  | -0.00060000 |
| C         | 2.54280000  | 3.46240000  | 0.00020000  |
| C         | 3.49600000  | 2.49640000  | -0.00070000 |
| H         | 2.67780000  | 4.53480000  | 0.00050000  |
| H         | 4.57010000  | 2.61690000  | -0.00130000 |
| N         | -1.44190000 | 1.46080000  | 0.00030000  |
| C         | -1.22680000 | 2.80750000  | 0.00080000  |
| C         | -2.79140000 | 1.26400000  | -0.00030000 |
| C         | -2.49630000 | 3.49590000  | 0.00060000  |
| C         | -3.46250000 | 2.54280000  | -0.00060000 |
| H         | -2.61670000 | 4.57000000  | 0.00100000  |
| H         | -4.53490000 | 2.67790000  | -0.00130000 |
| C         | 3.42370000  | -0.02280000 | -0.00090000 |
| C         | 0.02280000  | 3.42340000  | 0.00090000  |
| C         | -3.42370000 | 0.02280000  | -0.00080000 |
| C         | -0.02280000 | -3.42340000 | 0.00090000  |
| H         | -0.02980000 | -4.50800000 | 0.00140000  |
| H         | -4.50840000 | 0.02980000  | -0.00130000 |
| H         | 0.02980000  | 4.50800000  | 0.00140000  |
| H         | 4.50840000  | -0.02980000 | -0.00140000 |
|           |             |             |             |
| Model Co2 |             |             |             |
| Co        | -0.02230000 | 0.00000000  | 0.00000000  |
| N         | -1.27420000 | -1.40550000 | 0.00040000  |
| C         | -2.62830000 | -1.23760000 | 0.00000000  |
| C         | -1.00180000 | -2.76440000 | 0.00020000  |
| C         | -3.25330000 | -2.53900000 | -0.00040000 |
| C         | -2.26000000 | -3.46690000 | -0.00030000 |
| H         | -4.32110000 | -2.70800000 | -0.00060000 |
| H         | -2.36010000 | -4.54370000 | -0.00070000 |
| N         | -1.27410000 | 1.40550000  | 0.00030000  |
| C         | -1.00160000 | 2.76450000  | 0.00020000  |
| C         | -2.62820000 | 1.23770000  | 0.00010000  |
| C         | -2.25980000 | 3.46700000  | -0.00010000 |
| C         | -3.25320000 | 2.53910000  | -0.00010000 |
| H         | -2.35990000 | 4.54380000  | -0.00030000 |

|           |             |             |             |
|-----------|-------------|-------------|-------------|
| H         | -4.32100000 | 2.70820000  | -0.00020000 |
| N         | 1.40590000  | 1.21680000  | -0.00020000 |
| C         | 2.66890000  | 0.71510000  | -0.00040000 |
| C         | 1.45160000  | 2.57890000  | 0.00010000  |
| C         | 3.58160000  | 1.79740000  | -0.00030000 |
| C         | 2.82410000  | 2.96120000  | 0.00010000  |
| H         | 4.65980000  | 1.72170000  | -0.00050000 |
| H         | 3.19340000  | 3.97760000  | 0.00040000  |
| N         | 1.40590000  | -1.21680000 | -0.00020000 |
| C         | 2.66880000  | -0.71520000 | -0.00030000 |
| C         | 1.45150000  | -2.57900000 | 0.00030000  |
| C         | 3.58150000  | -1.79760000 | 0.00000000  |
| C         | 2.82400000  | -2.96140000 | 0.00020000  |
| H         | 4.65970000  | -1.72190000 | 0.00010000  |
| H         | 3.19330000  | -3.97770000 | 0.00050000  |
| C         | -3.27340000 | 0.00010000  | 0.00000000  |
| C         | 0.26270000  | -3.32990000 | 0.00030000  |
| C         | 0.26280000  | 3.32990000  | 0.00020000  |
| H         | 0.33070000  | -4.41220000 | 0.00030000  |
| H         | 0.33090000  | 4.41220000  | 0.00030000  |
| H         | -4.35730000 | 0.00010000  | -0.00020000 |
|           |             |             |             |
| Model Co3 |             |             |             |
| Co        | 0.00000000  | 0.00000000  | 0.00000000  |
| N         | -0.03220000 | -2.09640000 | 0.00000000  |
| C         | 1.06160000  | -2.89140000 | -0.00020000 |
| C         | -1.15030000 | -2.85720000 | 0.00020000  |
| C         | 0.69780000  | -4.35970000 | -0.00020000 |
| C         | -0.83210000 | -4.33580000 | 0.00020000  |
| H         | 1.11370000  | -4.85710000 | 0.87930000  |
| H         | -1.26260000 | -4.82030000 | 0.88000000  |
| N         | -2.09640000 | 0.03220000  | 0.00000000  |
| C         | -2.85720000 | 1.15030000  | -0.00030000 |
| C         | -2.89140000 | -1.06160000 | 0.00030000  |
| C         | -4.33580000 | 0.83210000  | -0.00030000 |
| C         | -4.35970000 | -0.69780000 | 0.00020000  |
| H         | -4.82040000 | 1.26320000  | 0.87920000  |
| H         | -4.85710000 | -1.11380000 | -0.87930000 |
| N         | 0.03220000  | 2.09640000  | 0.00010000  |
| C         | 1.15030000  | 2.85720000  | 0.00030000  |
| C         | -1.06160000 | 2.89140000  | -0.00020000 |
| C         | 0.83210000  | 4.33580000  | 0.00020000  |
| C         | -0.69780000 | 4.35970000  | -0.00020000 |
| H         | 1.26260000  | 4.82030000  | 0.88000000  |
| H         | -1.11370000 | 4.85710000  | 0.87930000  |
| N         | 2.09640000  | -0.03220000 | 0.00000000  |
| C         | 2.89140000  | 1.06160000  | 0.00020000  |
| C         | 2.85720000  | -1.15030000 | -0.00020000 |
| C         | 4.35970000  | 0.69780000  | 0.00020000  |
| C         | 4.33580000  | -0.83210000 | -0.00030000 |
| H         | 4.85710000  | 1.11370000  | -0.87940000 |
| H         | 4.82040000  | -1.26310000 | 0.87920000  |
| C         | -2.38060000 | 2.45520000  | -0.00040000 |
| C         | 2.45520000  | 2.38060000  | 0.00040000  |
| C         | 2.38060000  | -2.45520000 | -0.00040000 |

|           |             |             |             |
|-----------|-------------|-------------|-------------|
| C         | -2.45520000 | -2.38060000 | 0.00040000  |
| H         | -3.23460000 | -3.13650000 | 0.00060000  |
| H         | 3.13650000  | -3.23460000 | -0.00060000 |
| H         | 3.23460000  | 3.13650000  | 0.00050000  |
| H         | -3.13650000 | 3.23460000  | -0.00070000 |
| H         | 4.82030000  | -1.26260000 | -0.88000000 |
| H         | 4.85700000  | 1.11320000  | 0.88000000  |
| H         | 1.26320000  | 4.82040000  | -0.87920000 |
| H         | -1.11320000 | 4.85700000  | -0.88010000 |
| H         | -4.82030000 | 1.26260000  | -0.88010000 |
| H         | -4.85700000 | -1.11320000 | 0.88010000  |
| H         | -1.26310000 | -4.82040000 | -0.87920000 |
| H         | 1.11320000  | -4.85700000 | -0.88000000 |
|           |             |             |             |
| Model Co4 |             |             |             |
| Co        | 0.00210000  | 0.00130000  | -0.07300000 |
| N         | -2.18270000 | -0.00700000 | 0.09200000  |
| C         | -2.67800000 | 0.94990000  | -0.91880000 |
| C         | -2.76730000 | -1.34260000 | -0.11840000 |
| N         | -0.05240000 | -2.16290000 | -0.15190000 |
| C         | 1.26100000  | -2.82690000 | -0.29410000 |
| C         | -0.80330000 | -2.60660000 | 1.03890000  |
| N         | 2.07910000  | -0.18980000 | 0.46920000  |
| C         | 2.76840000  | 1.03680000  | 0.92670000  |
| C         | 2.88260000  | -0.88050000 | -0.57030000 |
| N         | -0.04590000 | 2.16950000  | -0.22700000 |
| C         | 1.11040000  | 2.88960000  | 0.35490000  |
| C         | -1.29240000 | 2.71880000  | 0.34740000  |
| C         | 2.14450000  | -2.03210000 | -1.24790000 |
| C         | 2.46280000  | 2.25700000  | 0.06830000  |
| C         | -2.53850000 | 2.40060000  | -0.46640000 |
| C         | -2.31840000 | -2.38150000 | 0.90230000  |
| H         | -2.72010000 | -2.11780000 | 1.88450000  |
| H         | 2.88860000  | -2.69140000 | -1.70000000 |
| H         | -2.79760000 | -3.31970000 | 0.61150000  |
| H         | -0.61510000 | -3.66890000 | 1.22570000  |
| H         | -0.40220000 | -2.05620000 | 1.89460000  |
| H         | -3.86050000 | -1.27370000 | -0.08180000 |
| H         | -2.51280000 | -1.65400000 | -1.13560000 |
| H         | -2.11520000 | 0.77470000  | -1.83990000 |
| H         | -3.73130000 | 0.74830000  | -1.14240000 |
| H         | -2.57170000 | 3.03540000  | -1.35610000 |
| H         | -3.39780000 | 2.67510000  | 0.15230000  |
| H         | -1.38150000 | 2.32100000  | 1.36190000  |
| H         | -1.20660000 | 3.80710000  | 0.44060000  |
| H         | 1.09600000  | 3.92240000  | -0.00990000 |
| H         | 0.95520000  | 2.92890000  | 1.43710000  |
| H         | 3.22530000  | 3.01100000  | 0.28170000  |
| H         | 2.55660000  | 2.01850000  | -0.99680000 |
| H         | 2.45580000  | 1.23130000  | 1.95550000  |
| H         | 3.84840000  | 0.85200000  | 0.94460000  |
| H         | 3.17330000  | -0.14080000 | -1.31790000 |
| H         | 3.80140000  | -1.25160000 | -0.10220000 |
| H         | 1.51820000  | -1.65710000 | -2.06490000 |
| H         | 1.72140000  | -2.90260000 | 0.69530000  |

|           |             |             |             |
|-----------|-------------|-------------|-------------|
| H         | 1.11360000  | -3.84920000 | -0.65470000 |
| H         | -0.05000000 | 2.37410000  | -1.22520000 |
| H         | -0.58350000 | -2.41650000 | -0.98110000 |
| H         | -2.48020000 | 0.31490000  | 1.01130000  |
| H         | 2.03760000  | -0.81480000 | 1.26990000  |
|           |             |             |             |
| Model Co5 |             |             |             |
| Co        | 0.00000000  | 0.00000000  | 0.07930000  |
| N         | 0.00000000  | 0.00000000  | 2.01620000  |
| C         | 0.00000000  | 1.08630000  | 2.84730000  |
| C         | 0.00000000  | -1.08630000 | 2.84730000  |
| C         | 0.00000000  | 0.67790000  | 4.22470000  |
| C         | 0.00000000  | -0.67790000 | 4.22470000  |
| H         | 0.00000000  | 1.35660000  | 5.06570000  |
| H         | 0.00000000  | -1.35660000 | 5.06570000  |
| N         | 0.00000000  | -1.94420000 | 0.02510000  |
| C         | 0.00000000  | -2.76780000 | -1.07020000 |
| C         | 0.00000000  | -2.79770000 | 1.10430000  |
| C         | 0.00000000  | -4.15920000 | -0.67500000 |
| C         | 0.00000000  | -4.17590000 | 0.67260000  |
| H         | 0.00000000  | -4.98840000 | -1.36770000 |
| H         | 0.00000000  | -5.02470000 | 1.34160000  |
| C         | 0.00000000  | 1.10790000  | -2.89690000 |
| C         | 0.00000000  | -1.10790000 | -2.89690000 |
| C         | 0.00000000  | 0.68390000  | -4.23310000 |
| C         | 0.00000000  | -0.68390000 | -4.23310000 |
| H         | 0.00000000  | 1.35610000  | -5.07730000 |
| H         | 0.00000000  | -1.35610000 | -5.07730000 |
| N         | 0.00000000  | 1.94420000  | 0.02510000  |
| C         | 0.00000000  | 2.76780000  | -1.07020000 |
| C         | 0.00000000  | 2.79770000  | 1.10430000  |
| C         | 0.00000000  | 4.15920000  | -0.67500000 |
| C         | 0.00000000  | 4.17590000  | 0.67260000  |
| H         | 0.00000000  | 4.98840000  | -1.36770000 |
| H         | 0.00000000  | 5.02470000  | 1.34160000  |
| C         | 0.00000000  | -2.38470000 | -2.39800000 |
| C         | 0.00000000  | 2.38470000  | -2.39800000 |
| C         | 0.00000000  | 2.40600000  | 2.42190000  |
| C         | 0.00000000  | -2.40600000 | 2.42190000  |
| H         | 0.00000000  | -3.18070000 | 3.18010000  |
| H         | 0.00000000  | 3.18070000  | 3.18010000  |
| H         | 0.00000000  | 3.17040000  | -3.14390000 |
| H         | 0.00000000  | -3.17040000 | -3.14390000 |
| O         | 0.00000000  | 0.00000000  | -2.07150000 |
|           |             |             |             |
| Model Co6 |             |             |             |
| Co        | -0.00190000 | 0.00230000  | 0.47080000  |
| C         | -2.97170000 | 1.08920000  | -0.05630000 |
| C         | -2.95230000 | -1.13460000 | -0.02650000 |
| C         | -4.30840000 | 0.65030000  | -0.09310000 |
| C         | -4.29650000 | -0.72010000 | -0.07380000 |
| H         | -5.16210000 | 1.30880000  | -0.13680000 |
| H         | -5.13850000 | -1.39440000 | -0.09890000 |
| N         | 0.02220000  | -1.96600000 | 0.00720000  |
| C         | 1.12000000  | -2.77040000 | -0.08320000 |

|           |             |             |             |
|-----------|-------------|-------------|-------------|
| C         | -1.06760000 | -2.78240000 | -0.05320000 |
| C         | 0.70900000  | -4.15000000 | -0.19810000 |
| C         | -0.64330000 | -4.15780000 | -0.17790000 |
| H         | 1.38840000  | -4.98450000 | -0.29020000 |
| H         | -1.31510000 | -5.00020000 | -0.25080000 |
| C         | 2.94950000  | 1.13160000  | -0.02900000 |
| C         | 2.97120000  | -1.09060000 | -0.05490000 |
| C         | 4.29290000  | 0.71930000  | -0.07260000 |
| C         | 4.30630000  | -0.65220000 | -0.09020000 |
| H         | 5.13410000  | 1.39460000  | -0.09680000 |
| H         | 5.16050000  | -1.31000000 | -0.13130000 |
| N         | -0.01570000 | 1.96650000  | 0.00090000  |
| C         | 1.07300000  | 2.78710000  | -0.05640000 |
| C         | -1.11610000 | 2.76730000  | -0.08570000 |
| C         | 0.64420000  | 4.16080000  | -0.17490000 |
| C         | -0.70840000 | 4.14830000  | -0.19380000 |
| C         | 2.45300000  | -2.36920000 | -0.08610000 |
| C         | 2.41100000  | 2.40300000  | -0.04110000 |
| C         | -2.45100000 | 2.36560000  | -0.08790000 |
| C         | -2.40930000 | -2.40180000 | -0.03780000 |
| H         | -3.13780000 | -3.20330000 | -0.07380000 |
| H         | -3.19240000 | 3.15400000  | -0.14310000 |
| H         | 3.14360000  | 3.20080000  | -0.07560000 |
| H         | 3.19590000  | -3.15620000 | -0.14230000 |
| H         | 1.31250000  | 5.00640000  | -0.24370000 |
| H         | -1.39020000 | 4.98150000  | -0.27990000 |
| O         | -2.16440000 | -0.01530000 | -0.00890000 |
| O         | 2.16120000  | 0.01240000  | -0.01230000 |
|           |             |             |             |
| Model Co7 |             |             |             |
| Co        | 0.02030000  | 0.09230000  | 0.01850000  |
| C         | -1.03540000 | 2.88010000  | -0.00430000 |
| C         | -2.70240000 | 1.45520000  | -0.00160000 |
| C         | -2.25420000 | 3.65780000  | -0.01490000 |
| C         | -3.28440000 | 2.77840000  | -0.01300000 |
| H         | -2.29360000 | 4.73720000  | -0.02480000 |
| H         | -4.34470000 | 2.98340000  | -0.02130000 |
| C         | -1.48110000 | -2.69770000 | 0.00110000  |
| C         | -2.96800000 | -1.03400000 | 0.00170000  |
| C         | -2.76730000 | -3.26990000 | -0.00430000 |
| C         | -3.67940000 | -2.24870000 | -0.00250000 |
| H         | -2.95730000 | -4.33190000 | -0.00770000 |
| H         | -4.75590000 | -2.32030000 | -0.00290000 |
| C         | 2.76850000  | -1.46840000 | -0.00370000 |
| C         | 1.04860000  | -2.89530000 | -0.00580000 |
| C         | 3.29020000  | -2.77530000 | -0.01350000 |
| C         | 2.23650000  | -3.65050000 | -0.01280000 |
| H         | 4.34440000  | -3.00450000 | -0.01600000 |
| H         | 2.26750000  | -4.72900000 | -0.01530000 |
| N         | 1.57140000  | 1.34200000  | 0.01570000  |
| C         | 2.89200000  | 1.03580000  | 0.00730000  |
| C         | 1.45910000  | 2.69710000  | 0.00330000  |
| C         | 3.66700000  | 2.25610000  | -0.00540000 |
| C         | 2.78150000  | 3.28190000  | -0.00880000 |
| C         | -0.25910000 | -3.34740000 | -0.00360000 |

|           |             |             |             |
|-----------|-------------|-------------|-------------|
| C         | 3.42500000  | -0.25510000 | 0.00270000  |
| C         | 0.25730000  | 3.40370000  | -0.00440000 |
| C         | -3.43190000 | 0.26420000  | -0.00060000 |
| H         | -4.51180000 | 0.35530000  | -0.00180000 |
| H         | 0.33710000  | 4.48480000  | -0.01550000 |
| H         | 4.50590000  | -0.33540000 | -0.00160000 |
| H         | -0.34370000 | -4.42820000 | -0.00650000 |
| H         | 4.74610000  | 2.30010000  | -0.01300000 |
| H         | 2.98390000  | 4.34270000  | -0.01890000 |
| O         | 1.39640000  | -1.57000000 | -0.00470000 |
| N         | -1.34970000 | 1.55580000  | 0.00460000  |
| O         | -1.62820000 | -1.33490000 | 0.00500000  |
|           |             |             |             |
| Model Co8 |             |             |             |
| Co        | -0.26750000 | 0.00000000  | -0.00010000 |
| N         | -0.07200000 | 2.01230000  | 0.00000000  |
| C         | 1.03610000  | 2.86080000  | 0.00010000  |
| C         | -1.17250000 | 2.83300000  | -0.00010000 |
| C         | 0.59730000  | 4.20480000  | 0.00020000  |
| C         | -0.77760000 | 4.19210000  | 0.00000000  |
| H         | 1.25770000  | 5.06060000  | 0.00030000  |
| H         | -1.45640000 | 5.03290000  | 0.00000000  |
| N         | -2.15740000 | 0.00000000  | 0.00000000  |
| C         | -2.96410000 | -1.10570000 | 0.00020000  |
| C         | -2.96410000 | 1.10560000  | 0.00000000  |
| C         | -4.34970000 | -0.67510000 | 0.00030000  |
| C         | -4.34970000 | 0.67500000  | 0.00010000  |
| H         | -5.19670000 | -1.34630000 | 0.00050000  |
| H         | -5.19680000 | 1.34630000  | 0.00000000  |
| N         | -0.07190000 | -2.01230000 | 0.00000000  |
| C         | 1.03620000  | -2.86080000 | 0.00000000  |
| C         | -1.17250000 | -2.83300000 | 0.00010000  |
| C         | 0.59740000  | -4.20480000 | 0.00010000  |
| C         | -0.77750000 | -4.19210000 | 0.00020000  |
| H         | 1.25770000  | -5.06060000 | 0.00010000  |
| H         | -1.45640000 | -5.03290000 | 0.00030000  |
| C         | 2.96910000  | -1.29680000 | -0.00020000 |
| C         | 2.96900000  | 1.29680000  | 0.00010000  |
| C         | 4.28100000  | -0.68190000 | 0.00010000  |
| C         | 4.28100000  | 0.68200000  | 0.00020000  |
| H         | 5.18250000  | -1.28040000 | 0.00020000  |
| H         | 5.18250000  | 1.28050000  | 0.00050000  |
| C         | -2.52040000 | -2.40490000 | 0.00020000  |
| C         | 2.43880000  | -2.54690000 | 0.00000000  |
| C         | 2.43880000  | 2.54690000  | 0.00030000  |
| C         | -2.52050000 | 2.40490000  | -0.00010000 |
| H         | -3.27230000 | 3.18580000  | -0.00010000 |
| H         | 3.10960000  | 3.39930000  | 0.00050000  |
| H         | 3.10960000  | -3.39930000 | 0.00010000  |
| H         | -3.27230000 | -3.18580000 | 0.00040000  |
| S         | 1.85160000  | 0.00000000  | -0.00060000 |
|           |             |             |             |
| Model Co9 |             |             |             |
| Co        | 0.00000000  | 0.00000000  | 1.40450000  |
| C         | -1.70880000 | -2.51660000 | -0.25960000 |



|            |             |             |             |
|------------|-------------|-------------|-------------|
| C          | 0.78650000  | -2.94550000 | -0.26010000 |
| C          | -1.35610000 | -3.87710000 | -0.11940000 |
| C          | 0.00000000  | -4.11030000 | -0.11980000 |
| H          | -2.10620000 | -4.64520000 | 0.01720000  |
| H          | 0.45050000  | -5.08470000 | 0.01710000  |
| N          | 2.22840000  | -0.38260000 | -0.12860000 |
| C          | 3.20900000  | 0.55400000  | -0.12720000 |
| C          | 2.84840000  | -1.58860000 | -0.12580000 |
| C          | 4.51510000  | -0.08130000 | -0.09430000 |
| C          | 4.29030000  | -1.41620000 | -0.09310000 |
| H          | 5.46130000  | 0.44010000  | -0.08550000 |
| H          | 5.01360000  | -2.21870000 | -0.08400000 |
| C          | -0.78650000 | 2.94550000  | -0.26010000 |
| C          | 1.70880000  | 2.51660000  | -0.25960000 |
| C          | 0.00000000  | 4.11030000  | -0.11980000 |
| C          | 1.35610000  | 3.87710000  | -0.11940000 |
| H          | -0.45050000 | 5.08470000  | 0.01710000  |
| H          | 2.10620000  | 4.64520000  | 0.01720000  |
| N          | -2.22840000 | 0.38260000  | -0.12860000 |
| C          | -2.84840000 | 1.58860000  | -0.12580000 |
| C          | -3.20900000 | -0.55400000 | -0.12720000 |
| C          | -4.29030000 | 1.41620000  | -0.09310000 |
| C          | -4.51510000 | 0.08130000  | -0.09430000 |
| H          | -5.01360000 | 2.21870000  | -0.08400000 |
| H          | -5.46130000 | -0.44010000 | -0.08550000 |
| C          | 2.96340000  | 1.93140000  | -0.15970000 |
| C          | -2.16390000 | 2.80890000  | -0.15960000 |
| C          | -2.96340000 | -1.93140000 | -0.15970000 |
| C          | 2.16390000  | -2.80890000 | -0.15960000 |
| H          | 2.74570000  | -3.72020000 | -0.07050000 |
| H          | -3.81330000 | -2.60000000 | -0.07160000 |
| H          | -2.74570000 | 3.72020000  | -0.07050000 |
| H          | 3.81330000  | 2.60000000  | -0.07160000 |
| S          | -0.26030000 | -1.56850000 | -0.54200000 |
| S          | 0.26030000  | 1.56850000  | -0.54200000 |
|            |             |             |             |
| Model Co10 |             |             |             |
| Co         | 0.43010000  | 0.32100000  | 1.10090000  |
| C          | -1.37920000 | -2.81690000 | -0.34630000 |
| C          | 1.13300000  | -2.90960000 | -0.01220000 |
| C          | -0.88350000 | -4.09080000 | 0.06130000  |
| C          | 0.47020000  | -4.14130000 | 0.24540000  |
| H          | -1.55770000 | -4.91140000 | 0.26950000  |
| H          | 1.00220000  | -5.00120000 | 0.63030000  |
| N          | 2.17420000  | -0.11150000 | 0.13500000  |
| C          | 2.99660000  | 0.94760000  | -0.15920000 |
| C          | 2.93960000  | -1.23380000 | 0.09020000  |
| C          | 4.34350000  | 0.46550000  | -0.35060000 |
| C          | 4.31200000  | -0.87890000 | -0.17080000 |
| H          | 5.18860000  | 1.08690000  | -0.60860000 |
| H          | 5.12170000  | -1.58770000 | -0.26120000 |
| C          | -0.90100000 | 2.96220000  | 0.00950000  |
| C          | 1.27260000  | 2.77370000  | -0.21360000 |
| C          | -0.38240000 | 4.29150000  | -0.16700000 |
| C          | 0.95790000  | 4.17070000  | -0.34870000 |

|   |             |             |             |
|---|-------------|-------------|-------------|
| H | -0.98660000 | 5.18620000  | -0.20020000 |
| H | 1.68090000  | 4.94780000  | -0.54820000 |
| C | -2.86230000 | 1.43270000  | -0.02720000 |
| C | -3.09650000 | -1.03590000 | -0.33050000 |
| C | -4.03950000 | 0.90850000  | 0.55140000  |
| C | -4.16610000 | -0.45390000 | 0.38840000  |
| H | -4.69430000 | 1.51540000  | 1.16250000  |
| H | -4.93280000 | -1.05690000 | 0.85670000  |
| C | 2.58170000  | 2.26130000  | -0.28580000 |
| C | -2.26400000 | 2.67480000  | 0.15550000  |
| C | -2.69070000 | -2.38200000 | -0.27680000 |
| C | 2.44880000  | -2.55490000 | 0.17950000  |
| H | 3.16710000  | -3.34300000 | 0.37740000  |
| H | -3.42780000 | -3.10930000 | 0.04910000  |
| H | -2.90080000 | 3.49570000  | 0.47130000  |
| H | 3.35570000  | 2.98910000  | -0.50210000 |
| S | -0.01520000 | -1.75860000 | -0.66540000 |
| S | -2.08140000 | 0.20690000  | -0.97880000 |
| N | 0.13620000  | 2.05510000  | -0.00180000 |

#### Reference:

(S1) M. J. Frisch, et al. *Gaussian 09, Revision D.01*; Gaussian, Inc.: Wallingford CT, 2009.

(S2) J. -D. Chai and M. Head-Gordon, Long-range corrected hybrid density functionals with damped atom-atom dispersion corrections. *Phys. Chem. Chem. Phys.*, 2008, **10**, 6615-6620.

(S3) M. M. Francl, W. J. Pietro, W. J. Hehre, J. S. Binkley, M. S. Gordon, D. J. DeFrees, J. A. Pople, Self-consistent molecular orbital methods. XXIII. A polarization-type basis set for second-row elements. *J. Chem. Phys.*, 1982, **77**, 3654-3665.

(S4) D. Andrae, U. Häußermann, M. Dolg, H. Stoll, H. Preuß, Energy-adjusted ab initio pseudopotentials for the second and third row transition elements. *Theor. Chim. Acta*, 1990, **77**, 123-141.

(S5) S. Grimme, S. Ehrlich, L. Goerigk, Effect of the damping function in dispersion corrected density functional theory. *J. Comput. Chem.*, 2011, **32**, 1456-1465.

(S6) A. V. Marenich, C. J. Cramer, D. G. Truhlar, Universal solvation model based on solute electron density and on a continuum model of the solvent defined by the bulk dielectric constant and atomic surface tensions. *J. Phys. Chem. B*, 2009, **113**, 6378-6396.

(S7) T. Lu and F. Chen, Multiwfn: a multifunctional wavefunction analyzer. *J. Comput. Chem.*, 2012, **33**, 580-592.

(S8) K. Chan and J. K. Nørskov, Electrochemical barriers made simple. *J. Phys. Chem. Lett.*, 2015, **6**, 2663-2668.
